# Supplementary material
Source: HighWire-hosted journal article supplement (https://bmjopen.bmj.com/content/13/5/e073945)
Supplement: inline-supplementary-material-2 [file inline-supplementary-material-2.pdf]

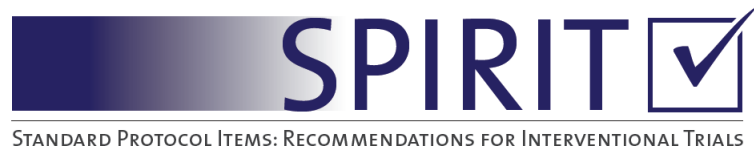

## Caffeine, Postoperative Delirium, And Change In Outcomes after Surgery (CAPACHINOS)-2: Protocol for a Randomised Controlled Trial

SPIRIT 2013 Checklist: Recommended items to address in a clinical trial protocol and related documents\*

| Section/item                      | ItemNo | Description                                                                                                  | Page Number                                                       |
|-----------------------------------|--------|--------------------------------------------------------------------------------------------------------------|-------------------------------------------------------------------|
| <b>Administrative information</b> |        |                                                                                                              |                                                                   |
| Title                             | 1      | Descriptive title identifying the study design, population, interventions, and, if applicable, trial acronym | 1                                                                 |
| Trial registration                | 2a     | Trial identifier and registry name. If not yet registered, name of intended registry                         | 4, 20, Table 3                                                    |
|                                   | 2b     | All items from the World Health Organization Trial Registration Data Set                                     | This information is available on the ClinicalTrials.gov registry. |
| Protocol version                  | 3      | Date and version identifier                                                                                  | Supplemental online appendix 1                                    |
| Funding                           | 4      | Sources and types of financial, material, and other support                                                  | 30 (within manuscript file)                                       |
| Roles and responsibilities        | 5a     | Names, affiliations, and roles of protocol contributors                                                      | 30 within manuscript file)                                        |

|                          |    |                                                                                                                                                                                                                                                                                          |                                                         |
|--------------------------|----|------------------------------------------------------------------------------------------------------------------------------------------------------------------------------------------------------------------------------------------------------------------------------------------|---------------------------------------------------------|
|                          | 5b | Name and contact information for the trial sponsor                                                                                                                                                                                                                                       | Online supplemental appendix 1                          |
|                          | 5c | Role of study sponsor and funders, if any, in study design; collection, management, analysis, and interpretation of data; writing of the report; and the decision to submit the report for publication, including whether they will have ultimate authority over any of these activities | 30                                                      |
|                          | 5d | Composition, roles, and responsibilities of the coordinating centre, steering committee, endpoint adjudication committee, data management team, and other individuals or groups overseeing the trial, if applicable (see Item 21a for data monitoring committee)                         | 17-18, Methods and Analysis, Data and Safety Monitoring |
| <b>Introduction</b>      |    |                                                                                                                                                                                                                                                                                          |                                                         |
| Background and rationale | 6a | Description of research question and justification for undertaking the trial, including summary of relevant studies (published and unpublished) examining benefits and harms for each intervention                                                                                       | 6, Table 1                                              |
|                          | 6b | Explanation for choice of comparators                                                                                                                                                                                                                                                    | 9, 10 (Methods and Analysis, Interventions)             |
| Objectives               | 7  | Specific objectives or hypotheses                                                                                                                                                                                                                                                        | 7                                                       |
| Trial design             | 8  | Description of trial design including type of trial (eg, parallel group, crossover, factorial, single group), allocation ratio, and framework (eg, superiority, equivalence, noninferiority, exploratory)                                                                                | 8 (Methods and Analysis, Trial Overview and Design)     |

**Methods: Participants, interventions, and outcomes**

|                      |     |                                                                                                                                                                                                |                                                                             |
|----------------------|-----|------------------------------------------------------------------------------------------------------------------------------------------------------------------------------------------------|-----------------------------------------------------------------------------|
| Study setting        | 9   | Description of study settings (eg, community clinic, academic hospital) and list of countries where data will be collected. Reference to where list of study sites can be obtained             | 8 (Methods and Analysis, Trial Overview and Design)                         |
| Eligibility criteria | 10  | Inclusion and exclusion criteria for participants. If applicable, eligibility criteria for study centres and individuals who will perform the interventions (eg, surgeons, psychotherapists)   | 9 (Methods and Analysis, Eligibility Criteria)                              |
| Interventions        | 11a | Interventions for each group with sufficient detail to allow replication, including how and when they will be administered                                                                     | 9-10 (Methods and analysis, Interventions)                                  |
|                      | 11b | Criteria for discontinuing or modifying allocated interventions for a given trial participant (eg, drug dose change in response to harms, participant request, or improving/worsening disease) | 11 (Methods and Analysis, Interventions)                                    |
|                      | 11c | Strategies to improve adherence to intervention protocols, and any procedures for monitoring adherence (eg, drug tablet return, laboratory tests)                                              | Online supplemental appendix 1 (Section 6.4. Study Intervention Compliance) |
|                      | 11d | Relevant concomitant care and interventions that are permitted or prohibited during the trial                                                                                                  | Supplemental online appendix 1 (Section 6.5. Concomitant Therapy)           |

|                      |    |                                                                                                                                                                                                                                                                                                                                                                                |                                                                                        |
|----------------------|----|--------------------------------------------------------------------------------------------------------------------------------------------------------------------------------------------------------------------------------------------------------------------------------------------------------------------------------------------------------------------------------|----------------------------------------------------------------------------------------|
| Outcomes             | 12 | Primary, secondary, and other outcomes, including the specific measurement variable (eg, systolic blood pressure), analysis metric (eg, change from baseline, final value, time to event), method of aggregation (eg, median, proportion), and time point for each outcome. Explanation of the clinical relevance of chosen efficacy and harm outcomes is strongly recommended | 11-13 (Methods and Analysis, Outcomes)                                                 |
| Participant timeline | 13 | Time schedule of enrolment, interventions (including any run-ins and washouts), assessments, and visits for participants. A schematic diagram is highly recommended (see Figure)                                                                                                                                                                                               | Figure 2, Online supplemental appendix (Section 1.3. Schedule of Activities)           |
| Sample size          | 14 | Estimated number of participants needed to achieve study objectives and how it was determined, including clinical and statistical assumptions supporting any sample size calculations                                                                                                                                                                                          | 15-16, (Methods and Analysis, Sample Size and Power Calculations)                      |
| Recruitment          | 15 | Strategies for achieving adequate participant enrolment to reach target sample size                                                                                                                                                                                                                                                                                            | Supplemental online appendix 1 (Section 5.5. Strategies for Recruitment and Retention) |

### Methods: Assignment of interventions (for controlled trials)

#### Allocation:

|                     |     |                                                                                                                                                                                                                                                                                                                                                          |                                                     |
|---------------------|-----|----------------------------------------------------------------------------------------------------------------------------------------------------------------------------------------------------------------------------------------------------------------------------------------------------------------------------------------------------------|-----------------------------------------------------|
| Sequence generation | 16a | Method of generating the allocation sequence (eg, computer-generated random numbers), and list of any factors for stratification. To reduce predictability of a random sequence, details of any planned restriction (eg, blocking) should be provided in a separate document that is unavailable to those who enrol participants or assign interventions | 8 (Methods and analysis, trial overview and design) |
|---------------------|-----|----------------------------------------------------------------------------------------------------------------------------------------------------------------------------------------------------------------------------------------------------------------------------------------------------------------------------------------------------------|-----------------------------------------------------|

|                                  |     |                                                                                                                                                                                                           |                                                                                    |
|----------------------------------|-----|-----------------------------------------------------------------------------------------------------------------------------------------------------------------------------------------------------------|------------------------------------------------------------------------------------|
| Allocation concealment mechanism | 16b | Mechanism of implementing the allocation sequence (eg, central telephone; sequentially numbered, opaque, sealed envelopes), describing any steps to conceal the sequence until interventions are assigned | 8 (Methods and Analysis, Trial Overview and Design) – managed by research pharmacy |
| Implementation                   | 16c | Who will generate the allocation sequence, who will enrol participants, and who will assign participants to interventions                                                                                 | 8 (Methods and Analysis, Trial Overview and Design)                                |
| Blinding (masking)               | 17a | Who will be blinded after assignment to interventions (eg, trial participants, care providers, outcome assessors, data analysts), and how                                                                 | 8 (Methods and Analysis, Trial Overview and Design)                                |
|                                  | 17b | If blinded, circumstances under which unblinding is permissible, and procedure for revealing a participant's allocated intervention during the trial                                                      | Supplemental online appendix 1. 10.1.6 Safety Oversight.                           |

**Methods: Data collection, management, and analysis**

|                         |     |                                                                                                                                                                                                                                                                                                                                                                                                              |                                                                                                                                                                               |
|-------------------------|-----|--------------------------------------------------------------------------------------------------------------------------------------------------------------------------------------------------------------------------------------------------------------------------------------------------------------------------------------------------------------------------------------------------------------|-------------------------------------------------------------------------------------------------------------------------------------------------------------------------------|
| Data collection methods | 18a | Plans for assessment and collection of outcome, baseline, and other trial data, including any related processes to promote data quality (eg, duplicate measurements, training of assessors) and a description of study instruments (eg, questionnaires, laboratory tests) along with their reliability and validity, if known. Reference to where data collection forms can be found, if not in the protocol | 11-13 (Methods and Analysis), supplemental online appendix 1 – sections 1.3 (schedule of activities), 3 (Objectives and endpoints), 10.1.9 (Data handling and record keeping) |
|                         | 18b | Plans to promote participant retention and complete follow-up, including list of any outcome data to be collected for participants who discontinue or deviate from intervention protocols                                                                                                                                                                                                                    | Online supplemental appendix 1, Section 5.5. Strategies for Recruitment and Retention                                                                                         |
| Data management         | 19  | Plans for data entry, coding, security, and storage, including any related processes to promote data quality (eg, double data entry; range checks for data values). Reference to where details of data management procedures can be found, if not in the protocol                                                                                                                                            | 13 (Methods and Analysis, Data Management)                                                                                                                                    |
| Statistical methods     | 20a | Statistical methods for analysing primary and secondary outcomes. Reference to where other details of the statistical analysis plan can be found, if not in the protocol                                                                                                                                                                                                                                     | 14-17 (Methods and Analysis, Statistical Analysis sections)                                                                                                                   |
|                         | 20b | Methods for any additional analyses (eg, subgroup and adjusted analyses)                                                                                                                                                                                                                                                                                                                                     | 16-17 Methods and analysis, prespecified substudy and subgroup analyses section)                                                                                              |

|                            |     |                                                                                                                                                                                                                                                                                                                                       |                                                                                                                                                                        |
|----------------------------|-----|---------------------------------------------------------------------------------------------------------------------------------------------------------------------------------------------------------------------------------------------------------------------------------------------------------------------------------------|------------------------------------------------------------------------------------------------------------------------------------------------------------------------|
|                            | 20c | Definition of analysis population relating to protocol non-adherence (eg, as randomised analysis), and any statistical methods to handle missing data (eg, multiple imputation)                                                                                                                                                       | 14-15 (Methods and Analysis, Statistical Analysis sections)                                                                                                            |
| <b>Methods: Monitoring</b> |     |                                                                                                                                                                                                                                                                                                                                       |                                                                                                                                                                        |
| Data monitoring            | 21a | Composition of data monitoring committee (DMC); summary of its role and reporting structure; statement of whether it is independent from the sponsor and competing interests; and reference to where further details about its charter can be found, if not in the protocol. Alternatively, an explanation of why a DMC is not needed | 17-18 (Data and safety monitoring section)                                                                                                                             |
|                            | 21b | Description of any interim analyses and stopping guidelines, including who will have access to these interim results and make the final decision to terminate the trial                                                                                                                                                               | 17-18 (Data and Safety Monitoring section). Additional DSMB information also provided in Supplemental online appendix 1.                                               |
| Harms                      | 22  | Plans for collecting, assessing, reporting, and managing solicited and spontaneously reported adverse events and other unintended effects of trial interventions or trial conduct                                                                                                                                                     | 17-88 (Data and Safety Monitoring section). Additional information provided in Supplemental online appendix 1 – Section 8.3. Adverse events and serious adverse events |
| Auditing                   | 23  | Frequency and procedures for auditing trial conduct, if any, and whether the process will be independent from investigators and the sponsor                                                                                                                                                                                           | 13 (Data Management)                                                                                                                                                   |

**Ethics and dissemination**

|                          |     |                                                                                                                                                                                                                                  |                                                                     |
|--------------------------|-----|----------------------------------------------------------------------------------------------------------------------------------------------------------------------------------------------------------------------------------|---------------------------------------------------------------------|
| Research ethics approval | 24  | Plans for seeking research ethics committee/institutional review board (REC/IRB) approval                                                                                                                                        | 4 (Abstract), 8 (Methods and Analysis, Trial Overview and Design)   |
| Protocol amendments      | 25  | Plans for communicating important protocol modifications (eg, changes to eligibility criteria, outcomes, analyses) to relevant parties (eg, investigators, REC/IRBs, trial participants, trial registries, journals, regulators) | 8 (Methods and analysis, Trial Overview and Design)                 |
| Consent or assent        | 26a | Who will obtain informed consent or assent from potential trial participants or authorised surrogates, and how (see Item 32)                                                                                                     | 8 (Methods and analysis, Trial Overview and Design)                 |
|                          | 26b | Additional consent provisions for collection and use of participant data and biological specimens in ancillary studies, if applicable                                                                                            | 8 (Methods and analysis, Trial Overview and Design)                 |
| Confidentiality          | 27  | How personal information about potential and enrolled participants will be collected, shared, and maintained in order to protect confidentiality before, during, and after the trial                                             | Online supplemental appendix 1 – 10.1.3 Confidentiality and Privacy |
| Declaration of interests | 28  | Financial and other competing interests for principal investigators for the overall trial and each study site                                                                                                                    | 30 (manuscript submission file)                                     |



|                               |     |                                                                                                                                                                                                                                                                                     |                                                                                   |
|-------------------------------|-----|-------------------------------------------------------------------------------------------------------------------------------------------------------------------------------------------------------------------------------------------------------------------------------------|-----------------------------------------------------------------------------------|
| Access to data                | 29  | Statement of who will have access to the final trial dataset, and disclosure of contractual agreements that limit such access for investigators                                                                                                                                     | N/A                                                                               |
| Ancillary and post-trial care | 30  | Provisions, if any, for ancillary and post-trial care, and for compensation to those who suffer harm from trial participation                                                                                                                                                       | N/A<br>(harm/compensation descriptions are outlined in the written consent form). |
| Dissemination policy          | 31a | Plans for investigators and sponsor to communicate trial results to participants, healthcare professionals, the public, and other relevant groups (eg, via publication, reporting in results databases, or other data sharing arrangements), including any publication restrictions | 19-20 (Ethics and dissemination), online supplemental appendix (section 10.1.11)  |
|                               | 31b | Authorship eligibility guidelines and any intended use of professional writers                                                                                                                                                                                                      | N/A                                                                               |
|                               | 31c | Plans, if any, for granting public access to the full protocol, participant-level dataset, and statistical code                                                                                                                                                                     | Online supplemental appendix (section 10.1.11)                                    |
| <b>Appendices</b>             |     |                                                                                                                                                                                                                                                                                     |                                                                                   |
| Informed consent materials    | 32  | Model consent form and other related documentation given to participants and authorised surrogates                                                                                                                                                                                  | Will be uploaded to the ClinicalTrials.gov registry site.                         |
| Biological specimens          | 33  | Plans for collection, laboratory evaluation, and storage of biological specimens for genetic or molecular analysis in the current trial and for future use in ancillary studies, if applicable                                                                                      | Online supplemental appendix (section 10.1.4).                                    |

\*It is strongly recommended that this checklist be read in conjunction with the SPIRIT 2013 Explanation & Elaboration for important clarification on the items. Amendments to the protocol should be tracked and dated. The SPIRIT checklist is copyrighted by the SPIRIT Group under the Creative Commons "[Attribution-NonCommercial-NoDerivs 3.0 Unported](#)" license.
